# Supplementary material for: One-end nucleophilic addition of di- and triamines to PtIV-coordinated nitriles as an entry to (amidine)PtIV complexes bearing pendant NH2-groups
Source: Royal Society of Chemistry journal article supplement (doi:10.1039/c001103g), 2010-01-01
Supplement: c001103g.pdf [file c001103g.pdf]

## Electronic supplementary information

# One-end nucleophilic addition of di- and triamines to Pt<sup>IV</sup> coordinated nitriles as an entry to (amidine)Pt<sup>IV</sup> complexes bearing pendant NH<sub>2</sub>-groups<sup>†</sup>

Nadezhda A. Bokach,\* Nina P. Konovalova, Yu Wang, Yulia E. Moskalenko,

Alexander V. Griбанov, and Vadim Yu. Kukushkin\*

*Department of Chemistry, St.Petersburg State University, Univeritetsky Pr. 26, 198504 Stary*

*Petergof, Russian Federation. Fax: 007 812 4284582; Tel: 007 812 4284582; E-mail:*

[kukushkin@vk2100.spb.edu](mailto:kukushkin@vk2100.spb.edu)

## Antimetastatic and Chemosensibilizing Activity of Complex 1

### Materials and methods

*Cyclophosphamide* (CPA) was obtained from “Deco” (Russian Federation), while *Doxorubicine* (DOX) was acquired from “Pharmacia” (Milano, Italy). The cytostatic were used in subtherapeutic doses. All drugs were administered intraperitoneally.

### Animals

Ten-week-old male BDF<sub>1</sub> mice, weighting 22–23 g were employed.

### Experimental tumor

LL – carcinoma (10<sup>6</sup> cells) was used in the experiment. LL-carcinoma was transplanted intramuscularly. The tumor transplantation was carried out by the standard method.<sup>1</sup> Mice bearing LL-carcinoma were preanesthetized with ether narcosis and sacrificed on day 24 after tumor transplantation.

### Evaluation of therapeutic effect

Index inhibition of metastasis (IIM%) was used as criteria of therapy efficiency

$$IIM\% = \frac{(A_c \times B_c) - (A \times B)}{A_c \times B_c} \times 100$$

where A – frequency of metastasis in experimental group;

A<sub>c</sub> – frequency of metastasis in control;

B – average number of metastases in the experimental group;

B<sub>c</sub> – average number of metastases in control.

### Results

Results of combined administration of drugs in mice bearing LL-carcinoma are given below in **Table S1**.

### Table S1

Increase of CPA and DOX Therapeutic Efficiency upon Addition of Complex 1 (LL-carcinoma)

| <b>Drug</b> | <b>Single dose,<br/>mg/kg</b> | <b>Schedule of<br/>injection, days</b> | <b>IIM%</b> |
|-------------|-------------------------------|----------------------------------------|-------------|
| CPA         | 20                            | 2; 7                                   | 9           |
| DOX         | 1.5                           | 2; 5; 8                                | 17          |
| Complex 1   | 20                            | 2–9                                    | 8           |
| CPA+        | 20 +                          | 2; 7                                   | 46          |
| Complex 1   | 20                            | 2–9                                    |             |
| DOX+        | 1.5+                          | 2; 5; 8                                | 65          |
| Complex 1   | 20                            | 2–9                                    |             |

The data given in **Table S1** demonstrates the augmentation of chemotherapeutic sensitivity of animals bearing LL-carcinoma. The combined administration resulted in increase of index inhibition of metastasis.

### Reference

1. Z. Sophina and A. Goldin (Eds.), Experimental evaluation of anticancer drugs in USSR and USA. *Medicina Publishers*, Moscow, 1980.

**Table S2.** Crystal data and structure refinement for  $[\mathbf{1}\cdot\mathbf{H}_2](\text{Pic})_2\cdot\text{EtOH}$

|                                   |                                                                                    |                               |
|-----------------------------------|------------------------------------------------------------------------------------|-------------------------------|
| Identification code               | ic12569                                                                            |                               |
| Empirical formula                 | C <sub>26</sub> H <sub>44</sub> Cl <sub>4</sub> N <sub>12</sub> O <sub>16</sub> Pt |                               |
| Formula weight                    | 1117.62                                                                            |                               |
| Temperature                       | 150(2) K                                                                           |                               |
| Wavelength                        | 0.71073 Å                                                                          |                               |
| Crystal system                    | Triclinic                                                                          |                               |
| Space group                       | P-1                                                                                |                               |
| Unit cell dimensions              | a = 8.9708(6) Å                                                                    | $\alpha = 61.723 (1)^\circ$ . |
|                                   | b = 11.5590(7) Å                                                                   | $\beta = 80.464 (1)^\circ$ .  |
|                                   | c = 11.5958(7) Å                                                                   | $\gamma = 78.180 (1)^\circ$ . |
| Volume                            | 1033.18(11) Å <sup>3</sup>                                                         |                               |
| Z                                 | 1                                                                                  |                               |
| Density (calculated)              | 1.796 Mg/m <sup>3</sup>                                                            |                               |
| Absorption coefficient            | 3.735 mm <sup>-1</sup>                                                             |                               |
| F(000)                            | 558                                                                                |                               |
| Crystal size                      | 0.15 x 0.10 x 0.08 mm <sup>3</sup>                                                 |                               |
| Theta range for data collection   | 2.00 to 27.50°.                                                                    |                               |
| Index ranges                      | -11 ≤ h ≤ 11, -15 ≤ k ≤ 15, -15 ≤ l ≤ 15                                           |                               |
| Reflections collected             | 13422                                                                              |                               |
| Independent reflections           | 4739 [R(int) = 0.0328]                                                             |                               |
| Completeness to theta = 27.50°    | 99.8 %                                                                             |                               |
| Absorption correction             | multi-scan                                                                         |                               |
| Max. and min. transmission        | 0.7543 and 0.6042                                                                  |                               |
| Refinement method                 | Full-matrix least-squares on F <sup>2</sup>                                        |                               |
| Data / restraints / parameters    | 4733 / 0 / 272                                                                     |                               |
| Goodness-of-fit on F <sup>2</sup> | 1.055                                                                              |                               |
| Final R indices [I > 2σ(I)]       | R1 = 0.0266, wR2 = 0.0640                                                          |                               |
| R indices (all data)              | R1 = 0.0266, wR2 = 0.0640                                                          |                               |
| Largest diff. peak and hole       | 1.289 and -1.082 e.Å <sup>-3</sup>                                                 |                               |

**Table S3.** Atomic coordinates ( $\times 10^4$ ) and equivalent isotropic displacement parameters ( $\text{\AA}^2 \times 10^3$ ) for ic12569.  $U(\text{eq})$  is defined as one third of the trace of the orthogonalized  $U^{ij}$  tensor.

|       | x        | y        | z        | $U(\text{eq})$ |
|-------|----------|----------|----------|----------------|
| Pt    | 0        | 0        | 0        | 16(1)          |
| Cl(1) | -403(1)  | 1260(1)  | 1120(1)  | 28(1)          |
| Cl(2) | -2212(1) | -905(1)  | 1052(1)  | 30(1)          |
| N(1)  | 1120(3)  | -1607(3) | 1451(2)  | 21(1)          |
| N(2)  | 2774(3)  | -753(3)  | 2057(3)  | 26(1)          |
| N(3)  | 2042(3)  | -553(3)  | 4564(3)  | 27(1)          |
| C(1)  | 2186(4)  | -1771(3) | 2182(3)  | 22(1)          |
| C(2)  | 2760(4)  | -3162(3) | 3164(3)  | 28(1)          |
| C(3)  | 4351(5)  | -3655(4) | 2714(5)  | 44(1)          |
| C(4)  | 3915(4)  | -787(3)  | 2842(3)  | 25(1)          |
| C(5)  | 3297(4)  | 21(3)    | 3569(3)  | 26(1)          |
| O(1)  | 2747(3)  | -3136(2) | 6204(2)  | 34(1)          |
| O(2)  | 3738(3)  | -1409(2) | 6750(3)  | 36(1)          |
| O(3)  | 4765(3)  | -2256(3) | 8583(3)  | 35(1)          |
| O(4)  | 2964(3)  | -5881(3) | 12283(3) | 39(1)          |
| O(5)  | 1362(3)  | -6961(2) | 12113(3) | 38(1)          |
| O(6)  | 17(3)    | -5809(2) | 7768(3)  | 38(1)          |
| O(7)  | 1957(3)  | -5346(3) | 6321(3)  | 43(1)          |
| N(4)  | 3958(3)  | -2312(3) | 7851(3)  | 26(1)          |
| N(6)  | 1263(3)  | -5396(3) | 7336(3)  | 29(1)          |
| N(5)  | 2221(3)  | -6108(3) | 11628(3) | 30(1)          |
| C(6)  | 2660(4)  | -3781(3) | 7422(3)  | 25(1)          |
| C(7)  | 3228(4)  | -3491(3) | 8327(3)  | 24(1)          |
| C(8)  | 3121(4)  | -4247(3) | 9668(3)  | 26(1)          |
| C(9)  | 2372(4)  | -5337(3) | 10216(3) | 25(1)          |
| C(10) | 1737(4)  | -5698(3) | 9447(3)  | 25(1)          |
| C(11) | 1918(4)  | -4969(3) | 8115(3)  | 25(1)          |
| O(8)  | -783(3)  | -998(3)  | 4080(2)  | 32(1)          |
| C(12) | -1169(5) | -2405(5) | 4666(5)  | 58(1)          |
| C(13) | -2796(6) | -2432(6) | 4719(5)  | 63(1)          |

**Table S4.** Bond lengths [Å] and angles [°] for [1•H<sub>2</sub>](Pic)<sub>2</sub>•EtOH

---

|                   |           |
|-------------------|-----------|
| Pt-N(1)           | 2.031(2)  |
| Pt-N(1)#1         | 2.031(2)  |
| Pt-Cl(1)#1        | 2.3148(8) |
| Pt-Cl(1)          | 2.3148(8) |
| Pt-Cl(2)          | 2.3153(8) |
| Pt-Cl(2)#1        | 2.3153(8) |
| N(1)-C(1)         | 1.308(4)  |
| N(2)-C(1)         | 1.324(4)  |
| N(2)-C(4)         | 1.462(4)  |
| N(3)-C(5)         | 1.480(4)  |
| C(1)-C(2)         | 1.506(4)  |
| C(2)-C(3)         | 1.528(5)  |
| C(4)-C(5)         | 1.506(5)  |
| O(1)-C(6)         | 1.244(4)  |
| O(2)-N(4)         | 1.223(4)  |
| O(3)-N(4)         | 1.234(4)  |
| O(4)-N(5)         | 1.233(4)  |
| O(5)-N(5)         | 1.235(4)  |
| O(6)-N(6)         | 1.239(4)  |
| O(7)-N(6)         | 1.217(4)  |
| N(4)-C(7)         | 1.457(4)  |
| N(6)-C(11)        | 1.457(4)  |
| N(5)-C(9)         | 1.444(4)  |
| C(6)-C(7)         | 1.433(5)  |
| C(6)-C(11)        | 1.458(4)  |
| C(7)-C(8)         | 1.375(5)  |
| C(8)-C(9)         | 1.374(5)  |
| C(9)-C(10)        | 1.384(5)  |
| C(10)-C(11)       | 1.364(5)  |
| O(8)-C(12)        | 1.527(6)  |
| C(12)-C(13)       | 1.457(7)  |
| <hr/>             |           |
| N(1)-Pt-N(1)#1    | 180.0(3)  |
| N(1)-Pt-Cl(1)#1   | 86.21(7)  |
| N(1)#1-Pt-Cl(1)#1 | 93.79(7)  |
| N(1)-Pt-Cl(1)     | 93.79(7)  |
| N(1)#1-Pt-Cl(1)   | 86.21(7)  |
| Cl(1)#1-Pt-Cl(1)  | 180.00(5) |

|                    |           |
|--------------------|-----------|
| N(1)-Pt-Cl(2)      | 86.55(7)  |
| N(1)#1-Pt-Cl(2)    | 93.45(7)  |
| Cl(1)#1-Pt-Cl(2)   | 89.59(3)  |
| Cl(1)-Pt-Cl(2)     | 90.41(3)  |
| N(1)-Pt-Cl(2)#1    | 93.45(7)  |
| N(1)#1-Pt-Cl(2)#1  | 86.55(7)  |
| Cl(1)#1-Pt-Cl(2)#1 | 90.41(3)  |
| Cl(1)-Pt-Cl(2)#1   | 89.59(3)  |
| Cl(2)-Pt-Cl(2)#1   | 180.00(7) |
| C(1)-N(1)-Pt       | 134.1(2)  |
| C(1)-N(2)-C(4)     | 127.2(3)  |
| N(1)-C(1)-N(2)     | 121.5(3)  |
| N(1)-C(1)-C(2)     | 118.3(3)  |
| N(2)-C(1)-C(2)     | 120.2(3)  |
| C(1)-C(2)-C(3)     | 111.4(3)  |
| N(2)-C(4)-C(5)     | 111.6(3)  |
| N(3)-C(5)-C(4)     | 111.5(3)  |
| O(2)-N(4)-O(3)     | 122.3(3)  |
| O(2)-N(4)-C(7)     | 119.0(3)  |
| O(3)-N(4)-C(7)     | 118.6(3)  |
| O(7)-N(6)-O(6)     | 123.7(3)  |
| O(7)-N(6)-C(11)    | 119.4(3)  |
| O(6)-N(6)-C(11)    | 116.8(3)  |
| O(4)-N(5)-O(5)     | 123.5(3)  |
| O(4)-N(5)-C(9)     | 118.0(3)  |
| O(5)-N(5)-C(9)     | 118.4(3)  |
| O(1)-C(6)-C(7)     | 126.8(3)  |
| O(1)-C(6)-C(11)    | 122.2(3)  |
| C(7)-C(6)-C(11)    | 111.0(3)  |
| C(8)-C(7)-C(6)     | 124.6(3)  |
| C(8)-C(7)-N(4)     | 115.0(3)  |
| C(6)-C(7)-N(4)     | 120.4(3)  |
| C(9)-C(8)-C(7)     | 119.3(3)  |
| C(8)-C(9)-C(10)    | 121.5(3)  |
| C(8)-C(9)-N(5)     | 119.2(3)  |
| C(10)-C(9)-N(5)    | 119.3(3)  |
| C(11)-C(10)-C(9)   | 118.2(3)  |
| C(10)-C(11)-N(6)   | 116.7(3)  |
| C(10)-C(11)-C(6)   | 125.4(3)  |
| N(6)-C(11)-C(6)    | 117.9(3)  |

C(13)-C(12)-O(8)

112.8(4)

---

Symmetry transformations used to generate equivalent atoms:

#1 -x,-y,-z

**Table S5.** Anisotropic displacement parameters ( $\text{\AA}^2 \times 10^3$ ) for  $[\mathbf{1} \cdot \text{H}_2](\text{Pic})_2 \cdot \text{EtOH}$  The anisotropic displacement factor exponent takes the form:  $-2\pi^2 [h^2 a^{*2} U^{11} + \dots + 2 h k a^* b^* U^{12}]$

|       | $U^{11}$ | $U^{22}$ | $U^{33}$ | $U^{23}$ | $U^{13}$ | $U^{12}$ |
|-------|----------|----------|----------|----------|----------|----------|
| Pt    | 16(1)    | 17(1)    | 15(1)    | -7(1)    | 0(1)     | -3(1)    |
| Cl(1) | 37(1)    | 25(1)    | 25(1)    | -14(1)   | -3(1)    | -1(1)    |
| Cl(2) | 22(1)    | 33(1)    | 26(1)    | -6(1)    | 2(1)     | -9(1)    |
| N(1)  | 22(1)    | 19(1)    | 21(1)    | -7(1)    | -3(1)    | -4(1)    |
| N(2)  | 31(2)    | 20(1)    | 24(1)    | -6(1)    | -8(1)    | -5(1)    |
| N(3)  | 25(1)    | 28(1)    | 30(2)    | -14(1)   | -1(1)    | -7(1)    |
| C(1)  | 21(2)    | 22(2)    | 22(2)    | -9(1)    | 2(1)     | -2(1)    |
| C(2)  | 29(2)    | 21(2)    | 32(2)    | -8(1)    | -10(1)   | -3(1)    |
| C(3)  | 39(2)    | 37(2)    | 65(3)    | -31(2)   | -20(2)   | 10(2)    |
| C(4)  | 21(2)    | 30(2)    | 29(2)    | -15(1)   | -2(1)    | -6(1)    |
| C(5)  | 24(2)    | 23(2)    | 29(2)    | -10(1)   | -2(1)    | -7(1)    |
| O(1)  | 51(2)    | 27(1)    | 24(1)    | -10(1)   | 1(1)     | -13(1)   |
| O(2)  | 41(2)    | 27(1)    | 36(1)    | -4(1)    | -9(1)    | -16(1)   |
| O(3)  | 36(1)    | 36(1)    | 37(1)    | -16(1)   | -6(1)    | -14(1)   |
| O(4)  | 43(2)    | 41(2)    | 31(1)    | -12(1)   | -8(1)    | -7(1)    |
| O(5)  | 44(2)    | 27(1)    | 32(1)    | -5(1)    | 0(1)     | -9(1)    |
| O(6)  | 37(2)    | 29(1)    | 52(2)    | -17(1)   | -9(1)    | -10(1)   |
| O(7)  | 57(2)    | 45(2)    | 38(2)    | -28(1)   | 0(1)     | -15(1)   |
| N(4)  | 22(1)    | 23(1)    | 33(2)    | -13(1)   | -1(1)    | -6(1)    |
| N(6)  | 34(2)    | 19(1)    | 36(2)    | -11(1)   | -10(1)   | -2(1)    |
| N(5)  | 30(2)    | 24(1)    | 29(2)    | -8(1)    | -2(1)    | 0(1)     |
| C(6)  | 24(2)    | 21(2)    | 28(2)    | -11(1)   | -1(1)    | -1(1)    |
| C(7)  | 20(2)    | 20(2)    | 31(2)    | -11(1)   | 0(1)     | -5(1)    |
| C(8)  | 22(2)    | 27(2)    | 30(2)    | -15(1)   | -5(1)    | 0(1)     |
| C(9)  | 23(2)    | 21(2)    | 24(2)    | -7(1)    | -1(1)    | 0(1)     |
| C(10) | 22(2)    | 18(1)    | 34(2)    | -10(1)   | -1(1)    | -3(1)    |
| C(11) | 23(2)    | 22(2)    | 31(2)    | -13(1)   | -2(1)    | -4(1)    |
| O(8)  | 31(1)    | 39(1)    | 25(1)    | -13(1)   | 0(1)     | -10(1)   |
| C(12) | 47(3)    | 83(4)    | 47(3)    | -36(3)   | -5(2)    | 1(2)     |
| C(13) | 64(3)    | 102(4)   | 34(2)    | -33(3)   | 10(2)    | -44(3)   |

**Table S6.** Hydrogen coordinates ( $\times 10^4$ ) and isotropic displacement parameters ( $\text{\AA}^2 \times 10^{-3}$ ).

|        | x     | y     | z     | U(eq) |
|--------|-------|-------|-------|-------|
| H(1)   | 823   | -2357 | 1627  | 26    |
| H(2)   | 2442  | 31    | 1431  | 31    |
| H(3A)  | 1283  | -607  | 4166  | 40    |
| H(3B)  | 1668  | -26   | 4962  | 40    |
| H(3C)  | 2403  | -1380 | 5176  | 40    |
| H(2A)  | 2042  | -3764 | 3285  | 34    |
| H(2B)  | 2796  | -3182 | 4022  | 34    |
| H(3D)  | 4324  | -3612 | 1853  | 66    |
| H(3E)  | 4671  | -4575 | 3352  | 66    |
| H(3F)  | 5077  | -3095 | 2649  | 66    |
| H(4A)  | 4824  | -436  | 2260  | 30    |
| H(4B)  | 4238  | -1718 | 3482  | 30    |
| H(5A)  | 4131  | 60    | 4007  | 31    |
| H(5B)  | 2916  | 940   | 2934  | 31    |
| H(8)   | 3560  | -4019 | 10211 | 31    |
| H(10)  | 1189  | -6434 | 9835  | 30    |
| H(8A)  | -1049 | -561  | 3308  | 47    |
| H(12A) | -599  | -2840 | 4133  | 69    |
| H(12B) | -827  | -2921 | 5566  | 69    |
| H(13A) | -3141 | -1927 | 3830  | 94    |
| H(13B) | -3363 | -2035 | 5274  | 94    |
| H(13C) | -2979 | -3354 | 5088  | 94    |



**Figure S1.** A packing diagram of  $[1\cdot H_2](Pic)_2\cdot EtOH$  within the unit cell
